# Supplementary material
Source: PubMed Central journal article supplement (PMC6736132)
Supplement: noz090_suppl_supplementary_material.pdf [file noz090_suppl_supplementary_material.pdf]

## SUPPLEMENTARY APPENDIX

### Table of Contents

|                                   |           |
|-----------------------------------|-----------|
| <b>Supplemental Methods</b> ..... | <b>2</b>  |
| <b>Supplemental Figures</b> ..... | <b>4</b>  |
| Figure S1.....                    | 4         |
| Figure S2.....                    | 5         |
| Figure S3.....                    | 6         |
| Figure S4.....                    | 7         |
| Figure S5.....                    | 8         |
| Figure S6.....                    | 9         |
| Legends .....                     | 10        |
| <b>Supplemental Tables</b> .....  | <b>11</b> |
| Table S1 .....                    | 11        |
| Table S2 .....                    | 13        |
| Table S3 .....                    | 22        |
| Table S4 .....                    | 23        |
| Table S5 .....                    | 24        |
| Table S6 .....                    | 25        |

## Supplemental Methods

### *Patient Derived Xenografts*

Between one and 15 experiments were performed per xenograft. The radiation dose was 20Gy in 2Gy/fraction either daily or BID in almost all of experiments. The TMZ doses were more varied. However, since no relationship was seen between TMZ dose and survival benefit in either the TMZ alone or TMZ+RT cohorts, all dose levels were included and treated equally. Full treatment data and PDX experimental results will be made available online at the Mayo Clinic PDX National Resource website:

[www.mayo.edu/research/labs/translational-neuro-oncology/mayo-clinic-brain-tumor-patient-derived-xenograft-national-resource](http://www.mayo.edu/research/labs/translational-neuro-oncology/mayo-clinic-brain-tumor-patient-derived-xenograft-national-resource)

RNAseq library preparation was performed using the Illumina TruSeq RNA Sample Prep Kit V2. Mouse RNAseq reads were filtered out using Xenome 1.0.1<sup>1</sup>, and mouse-only reads were excluded. RNAseq data were processed using a comprehensive bioinformatics pipeline from the Mayo Clinic: Map-RSeq<sup>2</sup>. Gene expression was quantified using RPKM. The full dataset is in the process of being deposited in cBioPortal (<http://www.cbioportal.org>).

### *TCGA*

Available clinical and molecular variables such as age, sex, treatment, prior treatment, surgery, IDH1, and MGMT were used. However, not all clinical variables had complete and well annotated data (e.g., performance status). MGMT promotor methylation was assessed using the same method as in TCGA utilizing the Illumina Infinium HumanMethylation27 and 450 BeadChip arrays<sup>3,4</sup>. In the 5 samples where both 27k and 450k data were available for the same probes, the values were averaged. MGMT promoter methylation was scaled by the standard deviation to make hazard ratios comparable with gene expression and the signatures.

### *Gene signature development*

Some PDXs had treatment responses assessed in multiple experiments and we treated each experiment, rather than each PDX, as an individual data point. Only genes that were available in both the PDX and TCGA samples were retained for analysis. Genes were ranked by the absolute value of the correlation coefficient in order to identify potential biomarkers for predicting treatment response. We did not utilize a more complex statistical model due to the significant technical differences between RNAseq (PDXs) and microarrays (TCGA) to prevent overfitting. Furthermore, since the correlation coefficients in the top genes were very similar, genes were weighted equally by utilizing a simple average. Genes with negative correlations were multiplied by -1 to invert their signs. Thus, increasing values are associated with increased treatment sensitivity, and decreasing values are associated with treatment resistance, allowing for combining of genes that were positively and negatively correlated to treatment resistance.

Centering and scaling was performed using the “scale” function in R applied to each gene with the default parameters. This function subtracts the mean expression for each gene (centering) and divides each gene by the standard deviation (scale).

The formulas for the three gene signatures are below (assuming centered and scaled gene expression data):

$$\text{Chemo-GS} = (-\text{GPRASP1} + -\text{MGMT}) / 2$$

$$\text{RT-GS} = (\text{CHGA} + \text{MAPK8}) / 2$$

$$\text{ChemoRT-GS} = (-\text{GPRASP1} + -\text{MGMT} + \text{CHGA} + \text{MAPK8} + -\text{ATP6V0A2} + -\text{FGF7}) / 6$$

### *Gene Set Enrichment Analysis*

The ranked gene list by Spearman's correlation coefficient from above was also utilized to run GSEA pre-ranked. The default parameters were used, and the following gene sets were included for assessment: H1:Hallmarks, C2:Canonical Pathways, and C5:GO Biological Processes. Volcano plots were created by plotting the normalized enrichment scores versus the -log of the p-values from GSEA.

#### *References*

1. Conway T, Wazny J, Bromage A, et al. Xenome--a tool for classifying reads from xenograft samples. *Bioinformatics*. 2012;28(12):i172-178.
2. Kalari KR, Nair AA, Bhavsar JD, et al. MAP-RSeq: Mayo Analysis Pipeline for RNA sequencing. *BMC Bioinformatics*. 2014;15:224.
3. Bady P, Sciuscio D, Diserens AC, et al. MGMT methylation analysis of glioblastoma on the Infinium methylation BeadChip identifies two distinct CpG regions associated with gene silencing and outcome, yielding a prediction model for comparisons across datasets, tumor grades, and CIMP-status. *Acta Neuropathol*. 2012;124(4):547-560.
4. Brennan CW, Verhaak RG, McKenna A, et al. The somatic genomic landscape of glioblastoma. *Cell*. 2013;155(2):462-477.

**Figure S1**

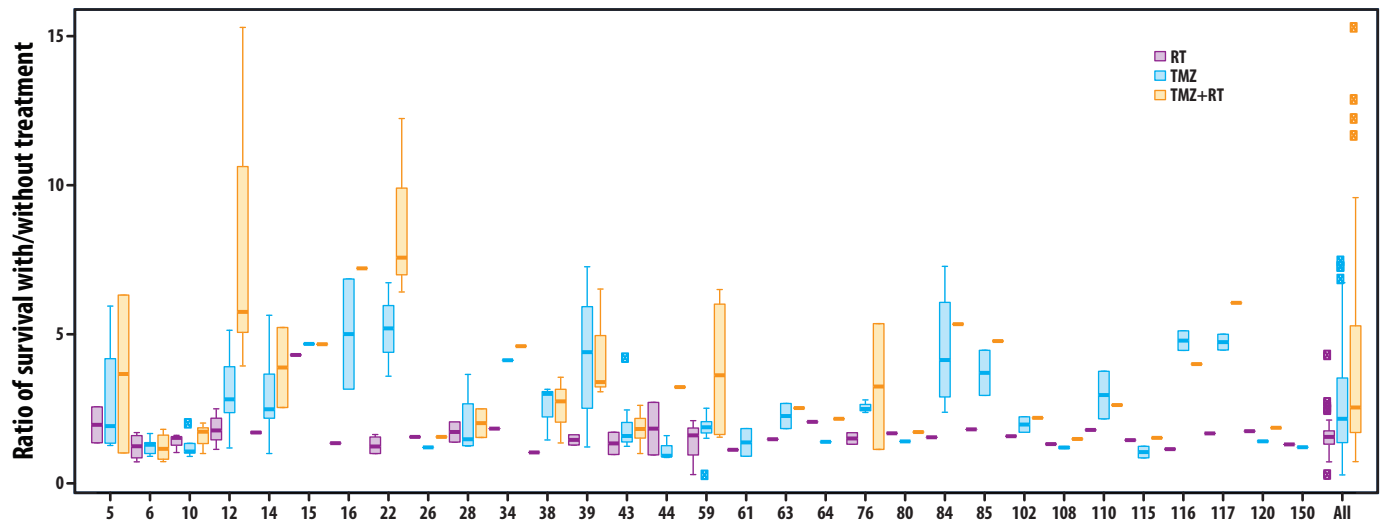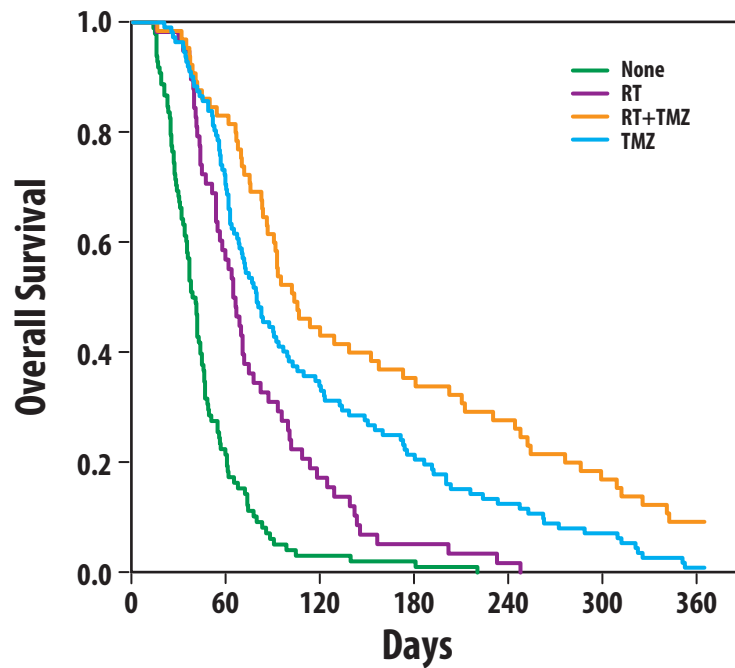

**Figure S2**

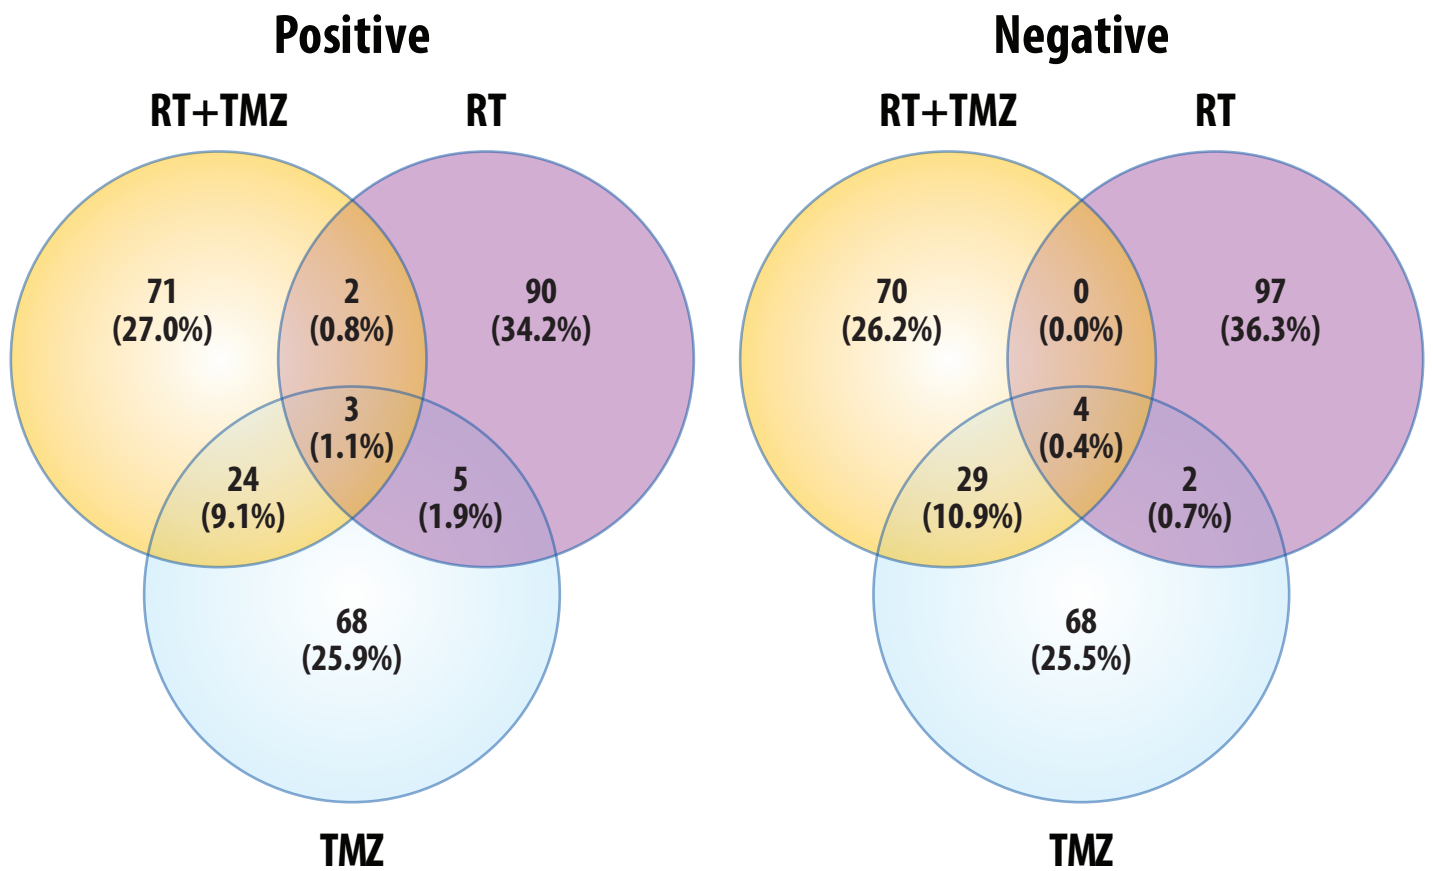

Figure S3

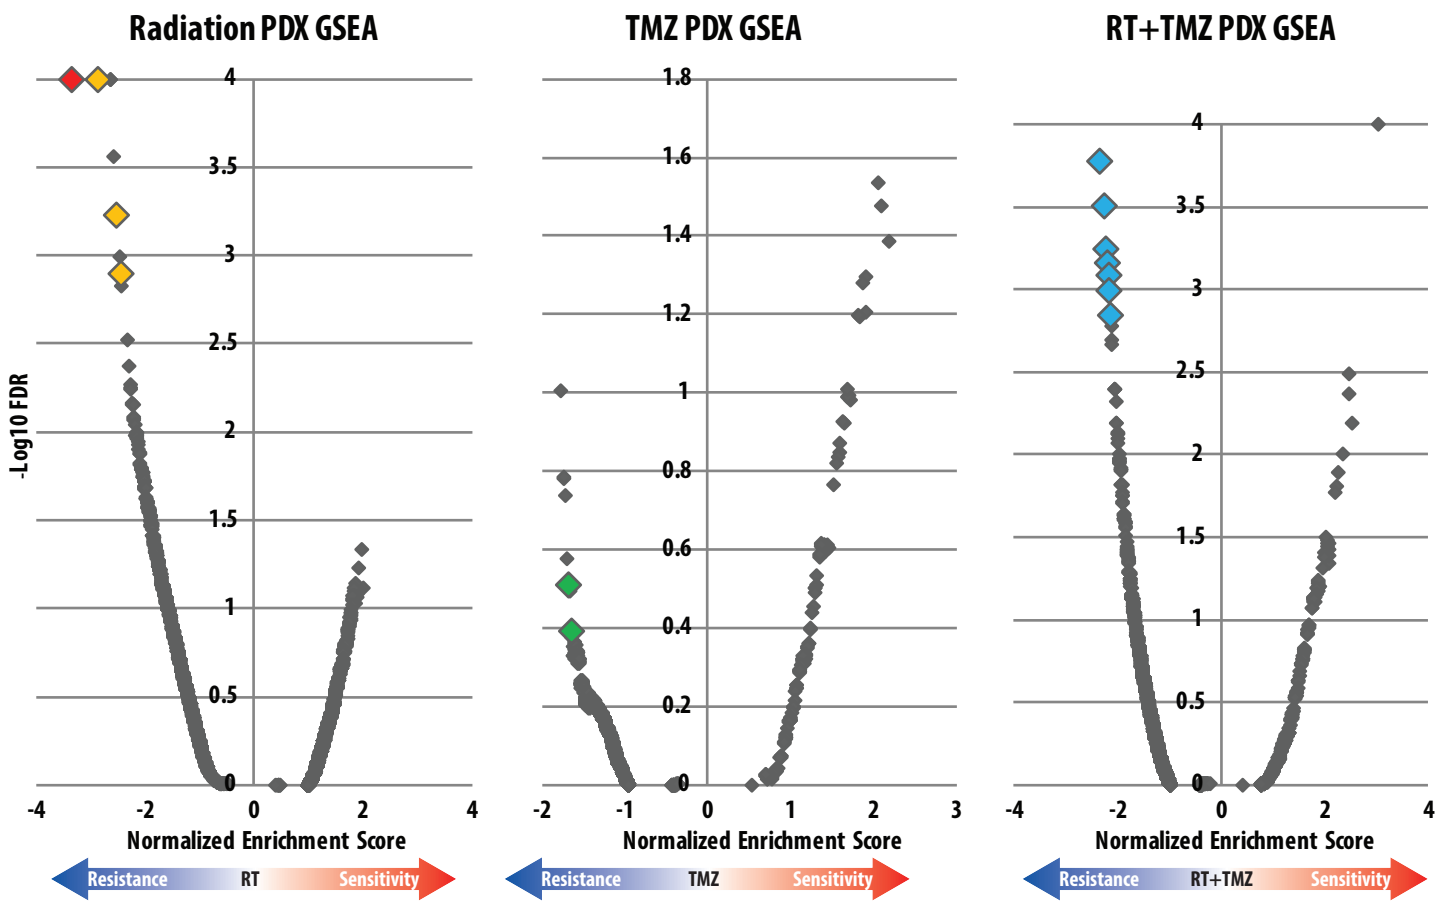

Figure S4

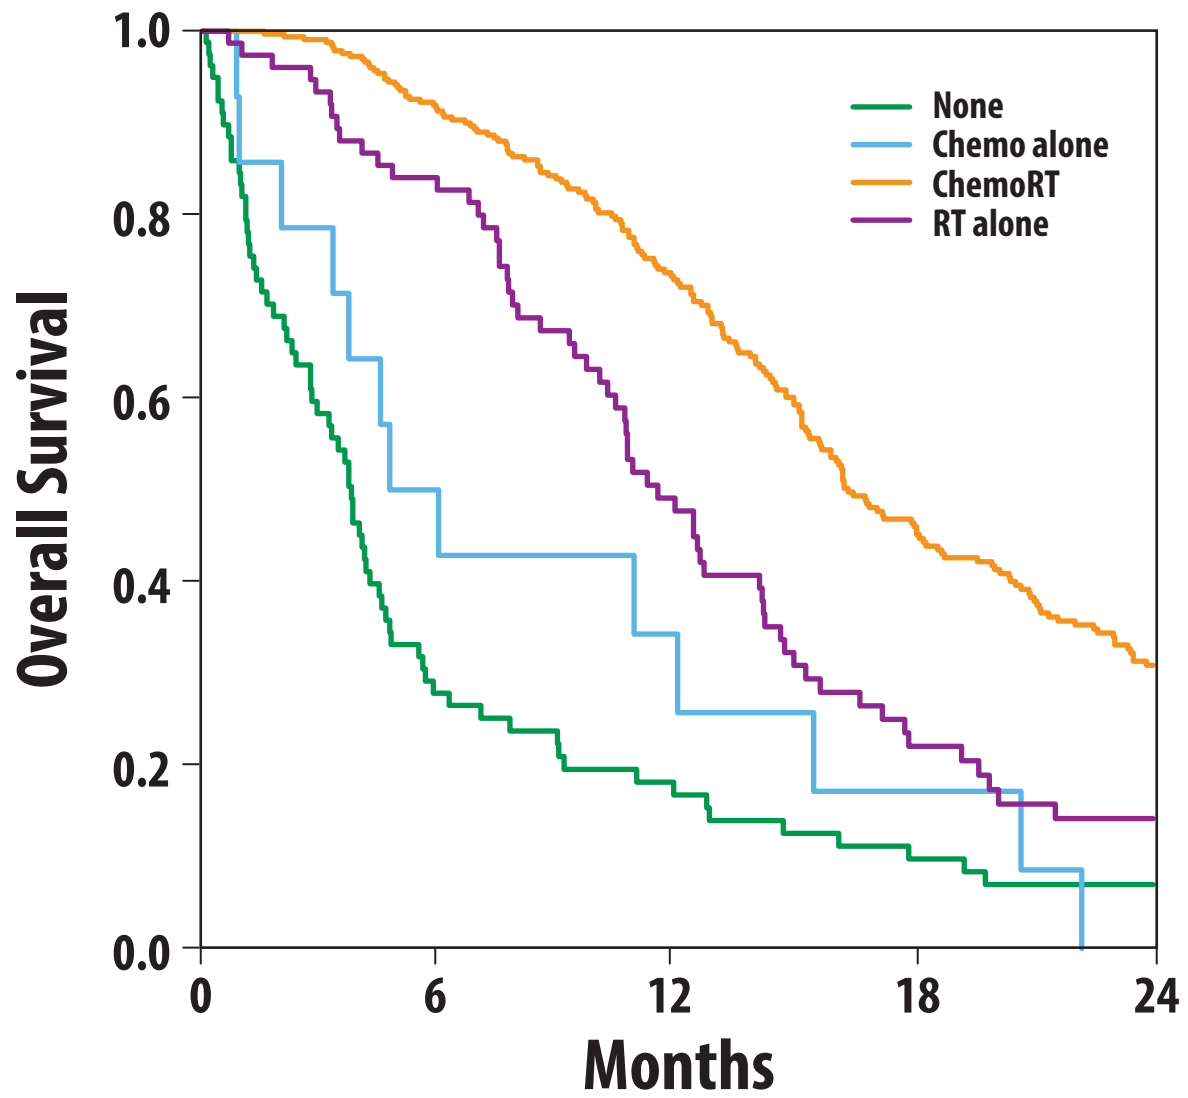

**Figure S5**

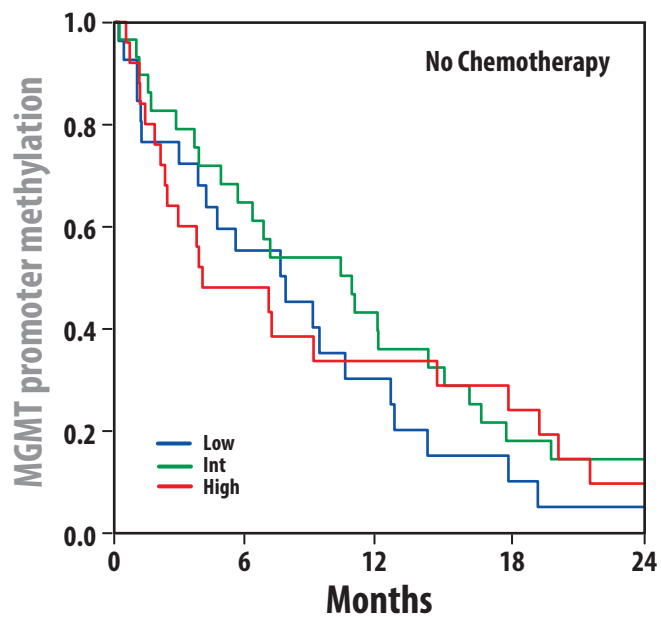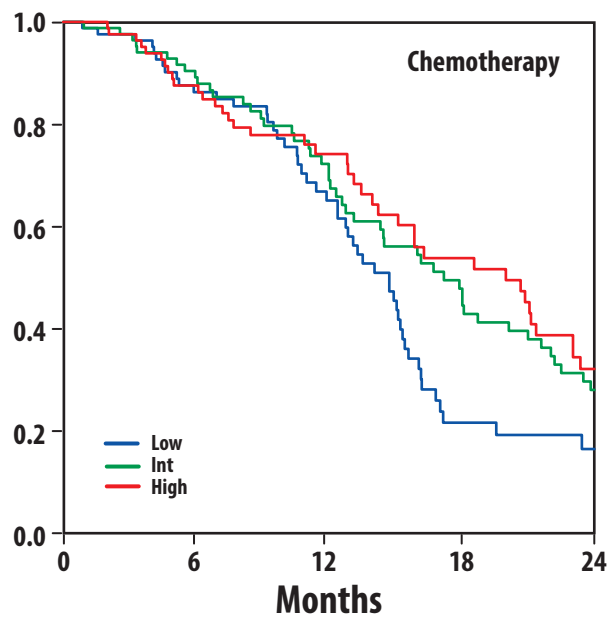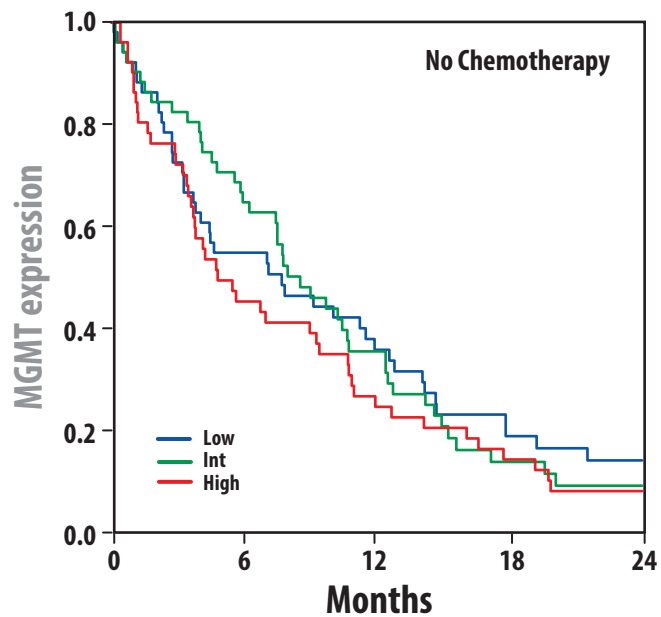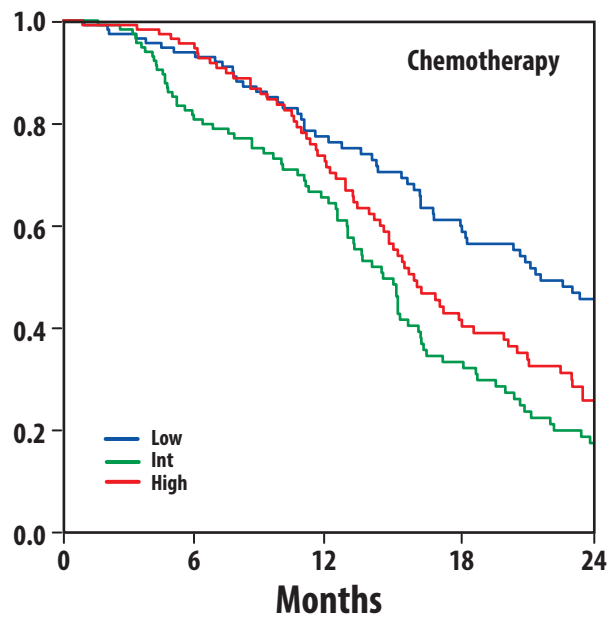



**Figure S6**

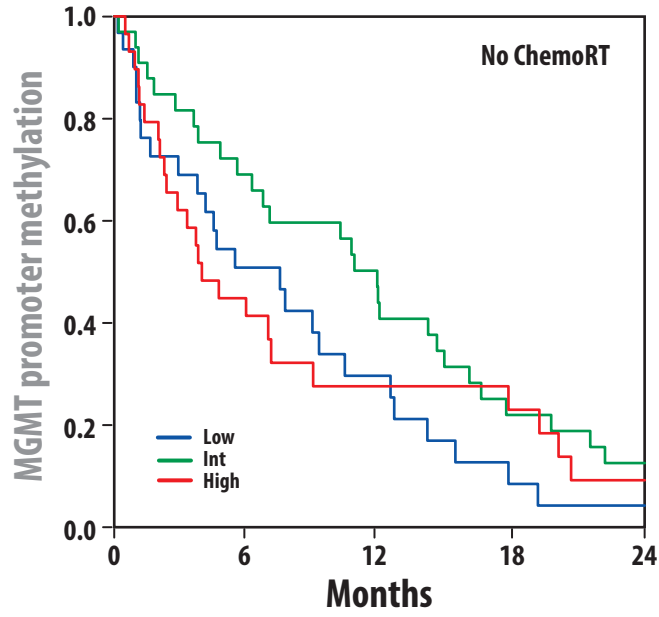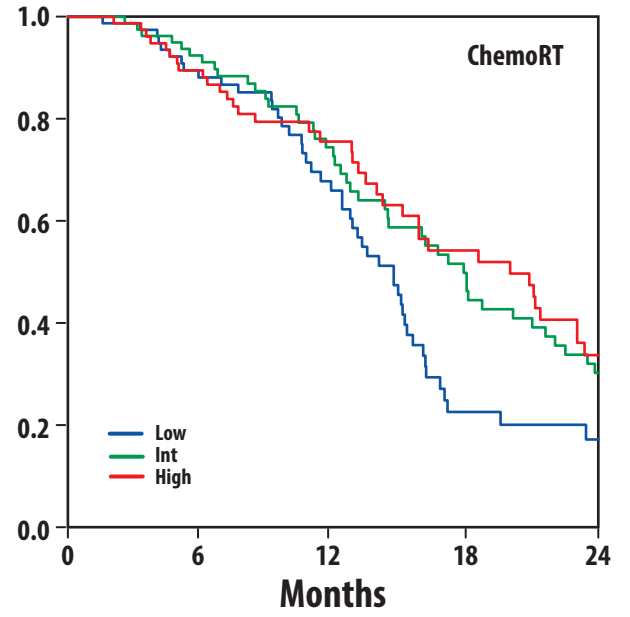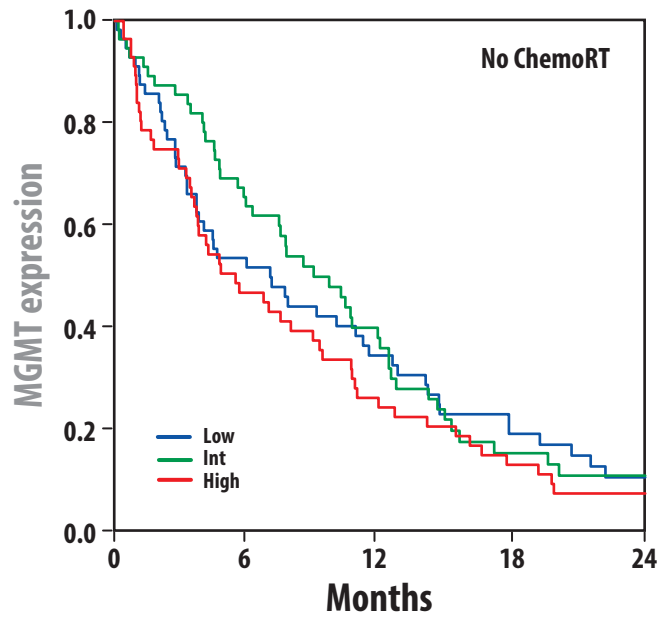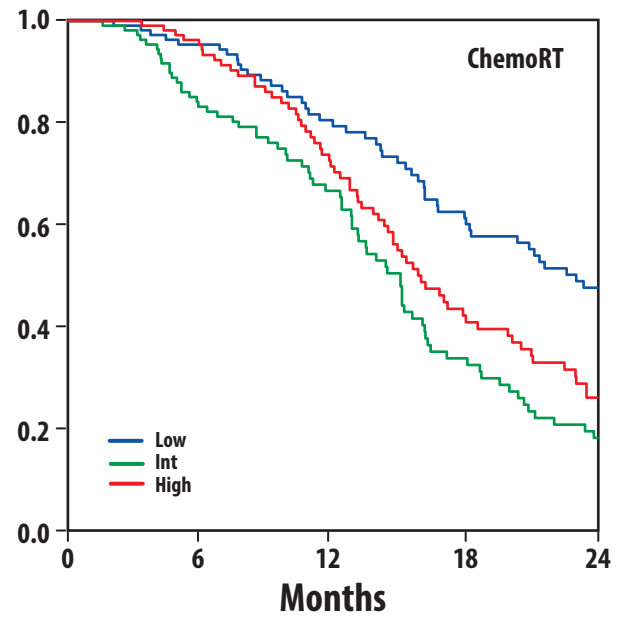

## Supplemental Figure Legends

Figure S1: (A) Boxplots showing range of survival ratios between treated and untreated PDXs for RT, TMZ, and RT+TMZ. (B) Kaplan Meier curves showing survival of the PDXs with no treatment, RT, TMZ, and RT+TMZ.

Figure S2: Overlap between the top 100 most positively and negatively correlated genes with treatment response

Figure S3: GSEA was performed on gene lists ranked by correlation to treatment response in the PDX. Red = EMT; Orange = ECM; Green = RAS signaling; Blue = DNA replication.

Figure S4: Kaplan Meier curves showing survival in TCGA with no treatment, RT, chemotherapy, and ChemoRT

Figures S5: Assessment of performance of MGMT promoter methylation and expression in TCGA. Chemotherapy is defined as alkylating chemotherapy with or without RT. No chemotherapy is defined as RT alone or no treatment. Kaplan-meier curves showing that both MGMT promoter methylation and expression are not prognostic in patients who did not receive chemotherapy, and borderline prognostic in patients who did receive chemotherapy.

Figure S6: Assessment of performance of MGMT promoter methylation in TCGA. ChemoRT is defined as alkylating chemotherapy with RT. No ChemoRT is defined as chemo alone, RT alone, or no treatment. Kaplan-meier curves showing that both MGMT promoter methylation and expression are not prognostic in patients who did not receive ChemoRT, and prognostic or borderline prognostic in patients who did receive ChemoRT.

**Table S1: Clinical and genomic characteristics of the PDXs**

|        | Gender | Age | MGMT | IDH1 | IDH2 | EGFR    | P53     | PTEN       | EGFR<br>Amplification |
|--------|--------|-----|------|------|------|---------|---------|------------|-----------------------|
| GBM5   | M      | 57  | M    | wt   | wt   | wt      | wt      | wt         | no                    |
| GBM6   | M      | 65  | U    | wt   | wt   | wt      | ins/del | wt         | yes                   |
| GBM10  | M      | 41  | U    | wt   | wt   | wt      | wt      | ins/del    | no                    |
| GBM12  | M      | 69  | M    | wt   | wt   | ins/del | splice  | wt         | yes                   |
| GBM14  | M      | 58  | U    | wt   | wt   | wt      | wt      | frameshift | no                    |
| GBM15  | M      |     | M    | wt   | wt   | ins/del | wt      | wt         | yes                   |
| GBM16  | F      |     | M    | wt   | wt   | wt      | wt      | wt         | no                    |
| GBM22  | M      | 80  | M    | wt   | wt   | wt      | ins/del | wt         | no                    |
| GBM26  | M      | 49  | U    | wt   | wt   | ins/del | wt      | wt         | yes                   |
| GBM28  | M      | 68  | U    | wt   | wt   | wt      | ins/del | ins/del    | no                    |
| GBM34  | F      | 46  | U    | wt   | wt   | wt      | wt      | wt         | yes                   |
| GBM38  | F      | 72  | U    | wt   | wt   | ins/del | wt      | wt         | yes                   |
| GBM39  | M      | 51  | M    | wt   | wt   | wt      | wt      | ins/del    | yes                   |
| GBM43  | M      | 69  | U    | wt   | wt   | wt      | ins/del | wt         | no                    |
| GBM44  | F      | 80  | U    | wt   | wt   | wt      | wt      | wt         | no                    |
| GBM59  | F      | 83  | M    | wt   | wt   | wt      | wt      | wt         | yes                   |
| GBM61  | F      | 45  | U    | wt   | wt   | wt      | wt      | wt         | yes                   |
| GBM63  | F      | 50  | M    | wt   | wt   | wt      | ins/del | wt         | yes                   |
| GBM64  | F      | 64  | U    | wt   | wt   | wt      | wt      | ins/del    | yes                   |
| GBM76  | M      | 38  | M    | wt   | wt   | wt      | wt      | ins/del    |                       |
| GBM80  | M      | 49  | U    | wt   | wt   | wt      | wt      | splice     |                       |
| GBM84  | F      | 49  | M    | wt   | wt   | ins/del | wt      | frameshift | yes                   |
| GBM85  | M      | 78  | M    | wt   | wt   | wt      | ins/del | ins/del    |                       |
| GBM102 | M      | 68  | M    | wt   | wt   | wt      | wt      | wt         |                       |
| GBM108 | M      | 62  | U    | wt   | wt   | wt      | wt      | ins/del    |                       |
| GBM110 | F      | 64  | U    | wt   | wt   | wt      | wt      | wt         |                       |
| GBM115 | F      | 76  | U    | wt   | wt   | wt      | wt      | wt         |                       |
| GBM116 | F      | 56  | M    | wt   | wt   | wt      | ins/del | frameshift |                       |
| GBM117 | M      | 63  | M    | wt   | wt   | wt      | ins/del | wt         |                       |
| GBM120 | M      | 57  | U    | wt   | wt   | wt      | ins/del | wt         |                       |
| GBM150 | M      | 65  | U    | wt   | wt   | wt      | wt      | wt         |                       |

M=methylated

U=unmethylated

wt=wildtype

ins/del=in-frame insertion or deletion

splice=splice site mutation

**Table S1:**

|        | Grade | PDX Start | Primary vs. Recurrent | Days in Flank | OS from Dx (yr) | OS from PDX (yr) |
|--------|-------|-----------|-----------------------|---------------|-----------------|------------------|
| GBM5   | IV    | 2000      | PRIMARY               | 20            | 2.57            | 2.57             |
| GBM6   | IV    | 2000      | PRIMARY               | 30            | 1.05            | 1.05             |
| GBM10  | IV    | 2001      | RECURRENT             | 30            | 2.50            | 0.62             |
| GBM12  | IV    | 2001      | PRIMARY               | 20            | 0.24            | 0.24             |
| GBM14  | IV    | 2001      | RECURRENT             | 30            | 0.90            | 0.38             |
| GBM15  | IV    | 2002      | PRIMARY               | 30            |                 |                  |
| GBM16  | IV    | 2002      | PRIMARY               | 20            |                 |                  |
| GBM22  | IV    | 2002      | PRIMARY               | 40            | 0.21            | 0.21             |
| GBM26  | IV    | 2002      | PRIMARY               | 40            | 0.73            | 0.73             |
| GBM28  | IV    | 2002      | PRIMARY               | 30            | 0.67            | 0.50             |
| GBM34  | IV    | 2003      | PRIMARY               | 60            | 0.88            | 0.88             |
| GBM38  | IV    | 2003      | PRIMARY               | 60            | 1.38            | 1.38             |
| GBM39  | IV    | 2003      | PRIMARY               | 30            | 2.41            | 2.41             |
| GBM43  | IV    | 2003      | PRIMARY               | 20            | 0.26            | 0.26             |
| GBM44  | IV    | 2003      | PRIMARY               | 30            | 1.40            | 1.36             |
| GBM59  | IV    | 2004      | PRIMARY               | 30            | 1.03            | 1.03             |
| GBM61  | IV    | 2006      | PRIMARY               | 120           | 2.88            | 2.88             |
| GBM63  | IV    | 2006      | PRIMARY               | 60            | 1.34            | 1.34             |
| GBM64  | IV    | 2006      | RECURRENT             | 90            | 1.02            | 0.13             |
| GBM76  | IV    | 2007      | RECURRENT             | 30            | 3.23            | 1.62             |
| GBM80  | IV    | 2007      | PRIMARY               | 120           | 0.98            | 0.98             |
| GBM84  | IV    | 2007      | PRIMARY               | 30            | 6.30            | 6.29             |
| GBM85  | IV    | 2008      | PRIMARY               | 30            | 0.13            | 0.13             |
| GBM102 | IV    | 2008      | RECURRENT             | 90            | 1.75            | 0.36             |
| GBM108 | IV    | 2009      | PRIMARY               | 60            | 0.67            | 0.67             |
| GBM110 | IV    | 2009      | PRIMARY               | 120           | 2.16            | 2.16             |
| GBM115 | IV    | 2009      | PRIMARY               | 120           | 0.34            | 0.34             |
| GBM116 | IV    | 2009      | PRIMARY               | 60            | 0.87            | 0.87             |
| GBM117 | IV    | 2009      | PRIMARY               | 90            | 0.81            | 0.81             |
| GBM120 | IV    | 2009      | RECURRENT             | 60            | 0.76            | 0.15             |
| GBM150 | IV    | 2011      | RECURRENT             | 90            | 1.22            | 1.22             |

**Table S2: Top genes correlated with treatment benefit in the PDXs**

Top 100 genes correlated with TMZ benefit

| Negatively Correlated |                |          | Positively Correlated |                |          |
|-----------------------|----------------|----------|-----------------------|----------------|----------|
| Gene                  | Spearman's Rho | P-value  | Gene                  | Spearman's Rho | P-value  |
| GPRASP1               | -0.482497195   | 7.16E-08 | TAC1                  | 0.459133457    | 3.55E-07 |
| MGMT                  | -0.472157143   | 1.47E-07 | TRPC7                 | 0.382735439    | 3.12E-05 |
| PNPLA2                | -0.468490489   | 1.90E-07 | EPB41L3               | 0.357637075    | 0.00011  |
| ELAC2                 | -0.45792981    | 3.84E-07 | PITX2                 | 0.329096833    | 0.0004   |
| TRAF1                 | -0.450900032   | 6.07E-07 | CRX                   | 0.327476346    | 0.00042  |
| RPH3AL                | -0.447517169   | 7.53E-07 | SERPINB7              | 0.316538797    | 0.00067  |
| PMVK                  | -0.445481307   | 8.57E-07 | KRT81                 | 0.309204795    | 0.00091  |
| PTPRT                 | -0.445303711   | 8.67E-07 | CCIN                  | 0.309038503    | 0.00092  |
| NAALADL1              | -0.444165737   | 9.31E-07 | NDST4                 | 0.299942552    | 0.00131  |
| SCAP                  | -0.443781839   | 9.54E-07 | RENBP                 | 0.292083216    | 0.00178  |
| SF3B4                 | -0.443011299   | 1.00E-06 | SLC24A3               | 0.290266321    | 0.00191  |
| SIPA1                 | -0.442768663   | 1.02E-06 | DACH1                 | 0.286523176    | 0.00219  |
| RIC8A                 | -0.437523341   | 1.41E-06 | GPR31                 | 0.284034682    | 0.00241  |
| CD3EAP                | -0.43498484    | 1.65E-06 | RALYL                 | 0.28193429     | 0.0026   |
| ITIH5                 | -0.433518494   | 1.80E-06 | SLC22A1               | 0.280699797    | 0.00272  |
| LASP1                 | -0.43267322    | 1.89E-06 | MS4A6A                | 0.280063821    | 0.00278  |
| ME1                   | -0.432474394   | 1.92E-06 | GYP A                 | 0.27948918     | 0.00284  |
| MRM1                  | -0.431814339   | 2.00E-06 | GIP                   | 0.27711994     | 0.0031   |
| CPT2                  | -0.429342774   | 2.32E-06 | FABP2                 | 0.27573438     | 0.00325  |
| FES                   | -0.428279166   | 2.47E-06 | NOV                   | 0.275273067    | 0.00331  |
| CUTC                  | -0.428139876   | 2.49E-06 | MYL2                  | 0.272592005    | 0.00364  |
| CD82                  | -0.427219508   | 2.63E-06 | PPARG                 | 0.272030209    | 0.00371  |
| CHD1L                 | -0.426440407   | 2.76E-06 | TAAR5                 | 0.26983701     | 0.00401  |
| HCN2                  | -0.421320856   | 3.73E-06 | AQP9                  | 0.269403144    | 0.00407  |
| DNAJC12               | -0.420858906   | 3.83E-06 | PRTN3                 | 0.268824488    | 0.00416  |
| PRCC                  | -0.420532933   | 3.90E-06 | SLC6A12               | 0.260356263    | 0.00556  |
| ANXA11                | -0.420511529   | 3.91E-06 | KLK2                  | 0.258159597    | 0.00599  |
| RSU1                  | -0.420490125   | 3.91E-06 | ALOXE3                | 0.257502732    | 0.00613  |
| GRN                   | -0.420464441   | 3.92E-06 | LUZP2                 | 0.255661378    | 0.00651  |
| DOCK9                 | -0.420451598   | 3.92E-06 | PRSS12                | 0.255551409    | 0.00654  |
| HLTF                  | -0.419347157   | 4.18E-06 | PAX3                  | 0.254765999    | 0.00671  |
| UBE2NL                | -0.417698566   | 4.60E-06 | GRIK1                 | 0.254348849    | 0.00681  |
| TIE1                  | -0.417392949   | 4.68E-06 | MRPS17                | 0.254014948    | 0.00688  |
| LRP8                  | -0.417266699   | 4.72E-06 | SLCO1B1               | 0.252787564    | 0.00717  |
| CCDC85B               | -0.416804945   | 4.85E-06 | CPVL                  | 0.252516676    | 0.00723  |
| PDE1C                 | -0.416675952   | 4.88E-06 | APOA4                 | 0.251295059    | 0.00753  |
| NPR1                  | -0.415712777   | 5.16E-06 | UGT2B17               | 0.250159721    | 0.00781  |
| ERAL1                 | -0.415220487   | 5.31E-06 | KLK3                  | 0.249226483    | 0.00805  |
| TNKS2                 | -0.415220487   | 5.31E-06 | SLC17A4               | 0.248850366    | 0.00815  |
| TRPM4                 | -0.415029058   | 5.37E-06 | SERPINA10             | 0.246091972    | 0.00891  |
| SPOCK2                | -0.414325805   | 5.59E-06 | KCNE2                 | 0.245308751    | 0.00914  |
| HSF4                  | -0.413947868   | 5.71E-06 | TPSG1                 | 0.24498129     | 0.00923  |
| SLC12A9               | -0.412626336   | 6.16E-06 | EIF5                  | 0.243103245    | 0.0098   |
| DRP2                  | -0.412471138   | 6.21E-06 | TBX3                  | 0.241074911    | 0.01045  |
| LRRC6                 | -0.412365801   | 6.25E-06 | IL2RA                 | 0.236630642    | 0.01201  |

|          |              |          |          |             |         |
|----------|--------------|----------|----------|-------------|---------|
| G6PC3    | -0.412330962 | 6.26E-06 | ZG16     | 0.235603022 | 0.01239 |
| IGSF1    | -0.411920338 | 6.41E-06 | ADM2     | 0.235107629 | 0.01258 |
| POLDIP2  | -0.411372068 | 6.61E-06 | PRR4     | 0.23163076  | 0.014   |
| LHPP     | -0.409016228 | 7.55E-06 | ARHGAP24 | 0.229531585 | 0.01491 |
| SULF1    | -0.408988589 | 7.56E-06 | FCN1     | 0.229059766 | 0.01513 |
| POLL     | -0.407184092 | 8.37E-06 | GRIN2B   | 0.226779055 | 0.01619 |
| LGR4     | -0.407104132 | 8.41E-06 | KLK8     | 0.226440088 | 0.01636 |
| CES3     | -0.406853125 | 8.52E-06 | MYCT1    | 0.22374226  | 0.01772 |
| TSSC4    | -0.405456033 | 9.21E-06 | ZIC3     | 0.221485268 | 0.01893 |
| ROR2     | -0.405220192 | 9.34E-06 | CIDEA    | 0.221401856 | 0.01898 |
| CABYR    | -0.404813916 | 9.55E-06 | BDKRB1   | 0.2211034   | 0.01914 |
| PFKM     | -0.404813916 | 9.55E-06 | GBAS     | 0.220119747 | 0.0197  |
| CC2D1A   | -0.403974884 | 1.00E-05 | TH       | 0.219834919 | 0.01986 |
| TM9SF3   | -0.403148693 | 1.05E-05 | EFCAB1   | 0.218392474 | 0.02071 |
| RUSC1    | -0.401111043 | 1.17E-05 | RELN     | 0.216683142 | 0.02175 |
| WWC1     | -0.400912375 | 1.18E-05 | SIX3     | 0.216369786 | 0.02194 |
| KLK6     | -0.400829753 | 1.19E-05 | RIMS2    | 0.215706265 | 0.02236 |
| FCRL2    | -0.400470372 | 1.21E-05 | ABCC9    | 0.215603527 | 0.02243 |
| POMGNT1  | -0.399531436 | 1.28E-05 | LILRP2   | 0.215538687 | 0.02247 |
| STAT5A   | -0.398743773 | 1.33E-05 | PLCL1    | 0.214945761 | 0.02285 |
| MAPK4    | -0.397410724 | 1.43E-05 | INHBE    | 0.214677438 | 0.02303 |
| HPS6     | -0.397030851 | 1.46E-05 | KRT2     | 0.212862072 | 0.02424 |
| HPS1     | -0.396475065 | 1.51E-05 | NFIL3    | 0.21281674  | 0.02427 |
| DNAH2    | -0.396461127 | 1.51E-05 | HMHB1    | 0.212302273 | 0.02462 |
| ADAMTS13 | -0.396342504 | 1.52E-05 | CDH5     | 0.21059002  | 0.02583 |
| C1orf54  | -0.396218114 | 1.53E-05 | HSPB8    | 0.210339219 | 0.02601 |
| PADI4    | -0.394863552 | 1.64E-05 | BTBD3    | 0.210308204 | 0.02604 |
| C21orf62 | -0.394781098 | 1.65E-05 | TPK1     | 0.210250375 | 0.02608 |
| ADAMTS1  | -0.393927897 | 1.73E-05 | SLC17A7  | 0.209489245 | 0.02664 |
| GPR137   | -0.392780649 | 1.84E-05 | PTGDR    | 0.209078169 | 0.02694 |
| APH1A    | -0.39251096  | 1.87E-05 | RUNX1T1  | 0.208844178 | 0.02712 |
| FHIT     | -0.391549943 | 1.96E-05 | MAN1A1   | 0.20869007  | 0.02723 |
| LYL1     | -0.389876091 | 2.15E-05 | IRF8     | 0.208277946 | 0.02755 |
| GPR3     | -0.389617233 | 2.18E-05 | ATXN7L1  | 0.208103603 | 0.02768 |
| SCAMP4   | -0.389574346 | 2.18E-05 | CCL19    | 0.207616827 | 0.02805 |
| SLC25A28 | -0.3894288   | 2.20E-05 | TMEM30B  | 0.207526522 | 0.02812 |
| KIAA1279 | -0.388902264 | 2.26E-05 | CRNN     | 0.207367202 | 0.02825 |
| GTF2E1   | -0.388123888 | 2.35E-05 | GCG      | 0.206743741 | 0.02873 |
| AMT      | -0.386278202 | 2.59E-05 | STAC     | 0.206621396 | 0.02883 |
| SEC24C   | -0.385892877 | 2.65E-05 | FGF13    | 0.2065454   | 0.02889 |
| FUT2     | -0.385855113 | 2.65E-05 | SLC6A4   | 0.206450643 | 0.02897 |
| RNMTL1   | -0.385854871 | 2.65E-05 | RBM39    | 0.203488925 | 0.0314  |
| AP2B1    | -0.385695961 | 2.67E-05 | GH2      | 0.203346033 | 0.03152 |
| PTPRR    | -0.385539371 | 2.69E-05 | APOC3    | 0.202491544 | 0.03226 |
| PTPRN2   | -0.385067137 | 2.76E-05 | DLGAP2   | 0.202181529 | 0.03253 |
| SLC39A1  | -0.384814121 | 2.80E-05 | CRIP1    | 0.201201227 | 0.0334  |
| PSPN     | -0.384446488 | 2.85E-05 | B3GNT3   | 0.20028767  | 0.03423 |
| UBE2M    | -0.384231935 | 2.88E-05 | CALCR    | 0.199757997 | 0.03472 |
| ETFB     | -0.384035019 | 2.91E-05 | GPR32    | 0.199723966 | 0.03475 |

|        |              |          |         |             |         |
|--------|--------------|----------|---------|-------------|---------|
| PRKAB1 | -0.383829542 | 2.94E-05 | SYT1    | 0.198643084 | 0.03576 |
| NUDCD3 | -0.383088967 | 3.06E-05 | CDH17   | 0.197432882 | 0.03693 |
| PLAGL1 | -0.382868001 | 3.10E-05 | SOX14   | 0.197085647 | 0.03727 |
| PRR7   | -0.382405331 | 3.17E-05 | SLCO1A2 | 0.196973407 | 0.03738 |
| ARR3   | -0.382181428 | 3.21E-05 | CSHL1   | 0.196729976 | 0.03762 |
| PNPO   | -0.382014492 | 3.23E-05 | LAMB4   | 0.196091088 | 0.03825 |

Top 100 genes correlated with RT benefit

| Negatively Correlated |                |         | Positively Correlated |                |         |
|-----------------------|----------------|---------|-----------------------|----------------|---------|
| Gene                  | Spearman's Rho | P-value | Gene                  | Spearman's Rho | P-value |
| CD7                   | -0.321774058   | 0.01377 | CHGA                  | 0.467107816    | 0.00022 |
| PTHLH                 | -0.319706258   | 0.01443 | MAPK8                 | 0.408350583    | 0.00146 |
| GRPR                  | -0.317439472   | 0.01518 | RCOR3                 | 0.403047329    | 0.00171 |
| NRAP                  | -0.309611124   | 0.01803 | RBM14                 | 0.392934146    | 0.00228 |
| CCL24                 | -0.308321503   | 0.01854 | NPPA                  | 0.392121006    | 0.00233 |
| PDE3A                 | -0.302504408   | 0.021   | CLCN6                 | 0.392070826    | 0.00234 |
| DPP4                  | -0.300435524   | 0.02194 | ZBTB17                | 0.388494213    | 0.00258 |
| COL5A2                | -0.2930973     | 0.02556 | RAB33A                | 0.388327217    | 0.00259 |
| MDFIC                 | -0.291131822   | 0.02661 | HNRNPR                | 0.385287594    | 0.00282 |
| RGS4                  | -0.291023667   | 0.02667 | TSPAN15               | 0.383986808    | 0.00292 |
| TXK                   | -0.290639265   | 0.02688 | FUBP1                 | 0.381032657    | 0.00317 |
| PTGES                 | -0.290260798   | 0.02709 | BMP8B                 | 0.380477665    | 0.00322 |
| HGF                   | -0.28906749    | 0.02775 | RSBN1                 | 0.380477665    | 0.00322 |
| APOBEC3C              | -0.286419994   | 0.02928 | PRPF38B               | 0.378936022    | 0.00335 |
| HOXB8                 | -0.283368092   | 0.03112 | PCDH11X               | 0.377105478    | 0.00352 |
| FOXC1                 | -0.280581108   | 0.03289 | TRIM17                | 0.37538224     | 0.00369 |
| HNF1B                 | -0.280457173   | 0.03297 | SIM2                  | 0.374804417    | 0.00375 |
| JAK3                  | -0.277928005   | 0.03465 | ZNF492                | 0.374510725    | 0.00378 |
| A4GALT                | -0.276224588   | 0.03583 | RALYL                 | 0.373541358    | 0.00387 |
| KCNN4                 | -0.274349401   | 0.03715 | PIK3C2B               | 0.37301611     | 0.00393 |
| PTPRR                 | -0.273455347   | 0.0378  | CHRNA4                | 0.3694994      | 0.00431 |
| AXL                   | -0.273192317   | 0.03799 | GNMT                  | 0.368255964    | 0.00445 |
| CD44                  | -0.272851433   | 0.03824 | ADM2                  | 0.367085231    | 0.00459 |
| TNFSF4                | -0.272065886   | 0.03883 | PCDH11Y               | 0.365442837    | 0.00479 |
| KRT7                  | -0.271298912   | 0.0394  | TRIT1                 | 0.365431223    | 0.00479 |
| WNT11                 | -0.269849313   | 0.04051 | DLK2                  | 0.363837716    | 0.00499 |
| GCNT1                 | -0.266908037   | 0.04283 | MYB                   | 0.361750755    | 0.00527 |
| C6orf15               | -0.264055471   | 0.04519 | AZGP1                 | 0.359726108    | 0.00555 |
| RRAS                  | -0.263860387   | 0.04535 | PLCL1                 | 0.359477871    | 0.00558 |
| C8orf4                | -0.262757752   | 0.04629 | PAIP2B                | 0.359281658    | 0.00561 |
| CHRNA9                | -0.261844199   | 0.04709 | FBXO42                | 0.358586325    | 0.00571 |
| IGFBP6                | -0.259866733   | 0.04884 | DCT                   | 0.35784938     | 0.00582 |
| COL4A5                | -0.259489468   | 0.04918 | FAT2                  | 0.356429465    | 0.00603 |
| CPN2                  | -0.259110725   | 0.04952 | SPTB                  | 0.356288185    | 0.00605 |
| PROCR                 | -0.256622548   | 0.05183 | ARVCF                 | 0.353714731    | 0.00645 |
| NPTX2                 | -0.256398953   | 0.05204 | GAL3ST1               | 0.352079476    | 0.00672 |
| OLFML3                | -0.256104303   | 0.05232 | HDAC2                 | 0.351248101    | 0.00686 |
| CTSZ                  | -0.255923102   | 0.0525  | BRSK2                 | 0.348473142    | 0.00735 |
| C3AR1                 | -0.255417746   | 0.05298 | C20orf27              | 0.347548156    | 0.00751 |
| CHST4                 | -0.25156351    | 0.05679 | KLK2                  | 0.347126047    | 0.00759 |
| LTBP2                 | -0.251539274   | 0.05682 | GTDC1                 | 0.346499838    | 0.00771 |
| ORAI3                 | -0.249958791   | 0.05844 | MADCAM1               | 0.346181385    | 0.00777 |
| TGM2                  | -0.248181321   | 0.06032 | SLC6A12               | 0.34600741     | 0.0078  |
| PHACTR2               | -0.247386466   | 0.06117 | PBOV1                 | 0.345020465    | 0.00799 |
| CLCF1                 | -0.246469188   | 0.06217 | FCHO1                 | 0.343650233    | 0.00826 |



|          |              |         |          |             |         |
|----------|--------------|---------|----------|-------------|---------|
| SLCO3A1  | -0.245685991 | 0.06303 | SRRM1    | 0.341998239 | 0.0086  |
| MYL9     | -0.245624066 | 0.0631  | LUZP2    | 0.341680909 | 0.00866 |
| PVRL3    | -0.244196362 | 0.0647  | TEX14    | 0.341366022 | 0.00873 |
| EPHA5    | -0.243588895 | 0.06539 | FYN      | 0.341319915 | 0.00874 |
| IL18     | -0.242689809 | 0.06642 | BAIAP3   | 0.340888255 | 0.00883 |
| PVRL2    | -0.242654718 | 0.06646 | GALNT8   | 0.340063825 | 0.00901 |
| COL4A6   | -0.24202584  | 0.06719 | OMG      | 0.338914951 | 0.00926 |
| EMP3     | -0.241236406 | 0.06811 | RNF43    | 0.337291484 | 0.00962 |
| PLS3     | -0.238954774 | 0.07084 | ADRBK2   | 0.337064979 | 0.00967 |
| TRPA1    | -0.238487418 | 0.07141 | RAPGEF4  | 0.335831664 | 0.00996 |
| MTMR11   | -0.237819874 | 0.07223 | RAP2A    | 0.335461669 | 0.01005 |
| EMP1     | -0.237228133 | 0.07297 | SHC2     | 0.333981691 | 0.0104  |
| ASB9     | -0.235872063 | 0.07467 | REC8     | 0.33385836  | 0.01043 |
| LIF      | -0.235537889 | 0.07509 | RENBP    | 0.333537129 | 0.01051 |
| CH25H    | -0.235190485 | 0.07554 | BCAS1    | 0.332614778 | 0.01074 |
| CXCL1    | -0.234699031 | 0.07617 | CPM      | 0.33225505  | 0.01083 |
| ANXA1    | -0.23451484  | 0.07641 | GPR17    | 0.3319864   | 0.0109  |
| MFSD5    | -0.234032363 | 0.07703 | ABCG4    | 0.3279077   | 0.01198 |
| CAV1     | -0.233934332 | 0.07716 | KHDRBS3  | 0.327876782 | 0.01199 |
| KCNJ15   | -0.233543174 | 0.07767 | SLC17A6  | 0.327183581 | 0.01218 |
| SHH      | -0.23310109  | 0.07825 | BLCAP    | 0.326581802 | 0.01235 |
| PLAGL1   | -0.232588186 | 0.07892 | RANBP9   | 0.326581802 | 0.01235 |
| TGFBR2   | -0.23219959  | 0.07944 | NPTX1    | 0.326031526 | 0.0125  |
| ARSJ     | -0.232109876 | 0.07956 | MAZ      | 0.325286821 | 0.01272 |
| BANK1    | -0.231463731 | 0.08042 | SPEN     | 0.324238503 | 0.01303 |
| LRRC17   | -0.231123224 | 0.08088 | STC2     | 0.323462749 | 0.01326 |
| DUSP6    | -0.230938226 | 0.08113 | PPY2     | 0.323155091 | 0.01335 |
| VNN1     | -0.230501691 | 0.08173 | PODXL2   | 0.322943522 | 0.01341 |
| SERPINA5 | -0.230116124 | 0.08225 | INSM1    | 0.322696859 | 0.01349 |
| SNCA     | -0.229457207 | 0.08316 | LCP1     | 0.322490593 | 0.01355 |
| ITGA4    | -0.22928955  | 0.08339 | VEZF1    | 0.320970218 | 0.01403 |
| CAV2     | -0.229229678 | 0.08347 | JARID2   | 0.320476893 | 0.01418 |
| CTGF     | -0.22890504  | 0.08392 | ELAVL3   | 0.31873784  | 0.01475 |
| MYO1B    | -0.228603728 | 0.08434 | PPP1R16B | 0.318269258 | 0.0149  |
| TFPI     | -0.228594928 | 0.08435 | SSTR5    | 0.317346519 | 0.01521 |
| BDNF     | -0.227889241 | 0.08534 | BAALC    | 0.316530285 | 0.01549 |
| ADM      | -0.226929953 | 0.0867  | SP4      | 0.316036959 | 0.01566 |
| ARPC1B   | -0.226559958 | 0.08723 | TRIB3    | 0.314590802 | 0.01617 |
| COL13A1  | -0.226386062 | 0.08748 | ITGA2B   | 0.314572848 | 0.01617 |
| NRP2     | -0.226313295 | 0.08759 | FBXO11   | 0.314495315 | 0.0162  |
| FCGR2C   | -0.22612829  | 0.08785 | PDIA2    | 0.3141407   | 0.01633 |
| CDSN     | -0.226077953 | 0.08792 | SGK3     | 0.313570329 | 0.01653 |
| SLC7A8   | -0.224012369 | 0.09094 | GRIN2B   | 0.312623181 | 0.01688 |
| TFPI2    | -0.223422512 | 0.09182 | DOCK3    | 0.31239868  | 0.01697 |
| TCTN2    | -0.223326184 | 0.09196 | NKX2-2   | 0.312090351 | 0.01708 |
| KRT16    | -0.223086537 | 0.09232 | CAND2    | 0.311967019 | 0.01713 |
| ETV4     | -0.222675016 | 0.09294 | GPD1     | 0.311830209 | 0.01718 |
| PSORS1C1 | -0.221780267 | 0.09429 | HBQ1     | 0.311571167 | 0.01728 |
| CRIM1    | -0.22014672  | 0.09681 | SYN3     | 0.311194601 | 0.01742 |

|        |              |         |         |             |         |
|--------|--------------|---------|---------|-------------|---------|
| BCAS4  | -0.219591729 | 0.09767 | RIC8B   | 0.310918702 | 0.01752 |
| CLEC2B | -0.219204387 | 0.09828 | TIA1    | 0.310178713 | 0.01781 |
| RIN1   | -0.21882357  | 0.09888 | P2RX7   | 0.309993715 | 0.01788 |
| ATP8B3 | -0.218399103 | 0.09955 | ST18    | 0.309386806 | 0.01812 |
| GPR3   | -0.218129528 | 0.09998 | ARHGDIG | 0.309239847 | 0.01817 |
| HOXB9  | -0.218082859 | 0.10006 | ACOXL   | 0.308399306 | 0.01851 |

Top 100 genes correlated with TMZ+RT benefit

Negatively Correlated

Positively Correlated

| Gene     | Spearman's Rho | P-value  | Gene    | Spearman's Rho | P-value  |
|----------|----------------|----------|---------|----------------|----------|
| ATP6V0A2 | -0.701888657   | 7.33E-11 | MBNL2   | 0.550767978    | 2.00E-06 |
| FGF7     | -0.693214594   | 1.56E-10 | TAC1    | 0.547379652    | 2.38E-06 |
| CD3EAP   | -0.692545057   | 1.65E-10 | EIF5    | 0.545109178    | 2.67E-06 |
| ELAC2    | -0.691558057   | 1.79E-10 | FGF13   | 0.522166909    | 8.15E-06 |
| COX10    | -0.690034584   | 2.04E-10 | SYT1    | 0.517736376    | 1.00E-05 |
| PFKM     | -0.689496323   | 2.13E-10 | UBE2B   | 0.511309909    | 1.35E-05 |
| CPT2     | -0.689189256   | 2.19E-10 | PTBP2   | 0.504686041    | 1.81E-05 |
| THAP10   | -0.687807456   | 2.46E-10 | DDX3X   | 0.491284774    | 3.25E-05 |
| RIC8A    | -0.682455723   | 3.83E-10 | CRX     | 0.4752574      | 6.32E-05 |
| GAPVD1   | -0.682148656   | 3.93E-10 | S100A8  | 0.472255941    | 7.13E-05 |
| ISG20L2  | -0.681161656   | 4.26E-10 | AP3S1   | 0.468583772    | 8.26E-05 |
| FUBP3    | -0.680350122   | 4.55E-10 | PITX2   | 0.465138025    | 9.47E-05 |
| GPR107   | -0.679187656   | 5.00E-10 | NOVA1   | 0.464789305    | 9.60E-05 |
| FAM120A  | -0.677323322   | 5.80E-10 | KCNE2   | 0.462768532    | 0.0001   |
| SLC25A44 | -0.677279455   | 5.83E-10 | SNAP25  | 0.461828304    | 0.00011  |
| PTGER1   | -0.674554483   | 7.24E-10 | AMELX   | 0.458483509    | 0.00012  |
| SCAP     | -0.673528855   | 7.85E-10 | SIX3    | 0.449984304    | 0.00017  |
| NCAPG    | -0.672870855   | 8.27E-10 | SLC6A4  | 0.444725198    | 0.00021  |
| TSSC4    | -0.671379388   | 9.30E-10 | MYT1L   | 0.44206637     | 0.00023  |
| DDX31    | -0.670458188   | 1.00E-09 | PFN2    | 0.438820236    | 0.00026  |
| RSU1     | -0.670107255   | 1.03E-09 | EPHA7   | 0.438447369    | 0.00026  |
| APH1A    | -0.669800188   | 1.05E-09 | DACH1   | 0.438206103    | 0.00026  |
| SLC12A9  | -0.669558921   | 1.07E-09 | ZIC3    | 0.435534308    | 0.00029  |
| ATP2A2   | -0.668067455   | 1.20E-09 | ANKS1B  | 0.435376702    | 0.00029  |
| TOR1B    | -0.667146255   | 1.29E-09 | RRAGB   | 0.430332035    | 0.00035  |
| SLC39A1  | -0.666663721   | 1.34E-09 | TRPC7   | 0.426907943    | 0.00039  |
| FLOT2    | -0.664470388   | 1.59E-09 | NPTN    | 0.421185834    | 0.00048  |
| CIZ1     | -0.663044721   | 1.77E-09 | PRMT8   | 0.420637501    | 0.00049  |
| SENP3    | -0.661882254   | 1.93E-09 | CLK4    | 0.418751234    | 0.00052  |
| SV2A     | -0.661487454   | 1.99E-09 | NDST4   | 0.418002733    | 0.00053  |
| NAALADL1 | -0.661327622   | 2.02E-09 | SLC22A1 | 0.416849761    | 0.00055  |
| RNMTL1   | -0.66078536    | 2.10E-09 | POU6F2  | 0.416097301    | 0.00057  |
| HLTF     | -0.658372921   | 2.52E-09 | RBM39   | 0.412916967    | 0.00063  |
| TATDN2   | -0.657429787   | 2.70E-09 | TBR1    | 0.4118203      | 0.00065  |
| WDR46    | -0.65593832    | 3.01E-09 | BCL11B  | 0.411184234    | 0.00067  |
| MEPCE    | -0.655587387   | 3.09E-09 | EIF4A2  | 0.408289033    | 0.00073  |
| C17orf53 | -0.655571245   | 3.10E-09 | AQP9    | 0.407745453    | 0.00075  |
| MRM1     | -0.655009345   | 3.23E-09 | NRXN3   | 0.406512433    | 0.00078  |
| GPRASP1  | -0.654973254   | 3.24E-09 | UBE2D3  | 0.4064905      | 0.00078  |
| GEMIN4   | -0.65363532    | 3.57E-09 | PPP3CB  | 0.404604233    | 0.00083  |
| APOC1    | -0.653534939   | 3.60E-09 | RELN    | 0.402685485    | 0.00088  |
| KIAA0907 | -0.65310892    | 3.71E-09 | CXCL12  | 0.401730679    | 0.00091  |
| LGR4     | -0.65304312    | 3.73E-09 | CCIN    | 0.400947236    | 0.00093  |
| SNX27    | -0.652823787   | 3.79E-09 | EPB41L3 | 0.399397287    | 0.00098  |
| AP2B1    | -0.652297387   | 3.94E-09 | ELAVL4  | 0.398199699    | 0.00102  |

|          |              |          |         |             |         |
|----------|--------------|----------|---------|-------------|---------|
| ZNF324B  | -0.650408231 | 4.52E-09 | ELAVL2  | 0.397432033 | 0.00104 |
| CEACAM1  | -0.650010484 | 4.65E-09 | GPM6B   | 0.396445032 | 0.00108 |
| PTPRCAP  | -0.649593679 | 4.79E-09 | MBD5    | 0.393286632 | 0.00119 |
| PMVK     | -0.649511853 | 4.82E-09 | RALYL   | 0.388088381 | 0.0014  |
| MMACHC   | -0.649445076 | 4.84E-09 | GRIN1   | 0.387781365 | 0.00141 |
| PLXNA1   | -0.648459053 | 5.20E-09 | MATR3   | 0.386246032 | 0.00148 |
| CDK5RAP2 | -0.64837132  | 5.23E-09 | NR1D1   | 0.384754565 | 0.00155 |
| ERMAP    | -0.64817392  | 5.31E-09 | IL26    | 0.382049338 | 0.00169 |
| TRIM44   | -0.647472053 | 5.58E-09 | SCRT1   | 0.381267165 | 0.00173 |
| COX7A1   | -0.647427397 | 5.60E-09 | PCBP3   | 0.377801698 | 0.00192 |
| LASP1    | -0.64685792  | 5.83E-09 | RENBP   | 0.377172833 | 0.00195 |
| RNF4     | -0.646682453 | 5.91E-09 | CXXC4   | 0.376573431 | 0.00199 |
| GPR3     | -0.646313459 | 6.07E-09 | NNAT    | 0.376025097 | 0.00202 |
| RPH3AL   | -0.645917191 | 6.24E-09 | ALOXE3  | 0.374227024 | 0.00213 |
| INTS3    | -0.645892853 | 6.25E-09 | EBF2    | 0.372446201 | 0.00225 |
| PNPLA2   | -0.64580512  | 6.29E-09 | RIMS1   | 0.37065143  | 0.00237 |
| SF3B4    | -0.645147119 | 6.59E-09 | EFNA3   | 0.369554764 | 0.00245 |
| TCAP     | -0.644232265 | 7.03E-09 | CPA4    | 0.369356614 | 0.00246 |
| FBXO41   | -0.643895576 | 7.20E-09 | KCNK3   | 0.367418889 | 0.00261 |
| MCM3AP   | -0.643743386 | 7.28E-09 | PPP3R1  | 0.366155097 | 0.0027  |
| DHX8     | -0.642909919 | 7.72E-09 | PLP1    | 0.364685563 | 0.00282 |
| TBRG4    | -0.642734453 | 7.82E-09 | PRSS12  | 0.36407143  | 0.00287 |
| DOLK     | -0.641462319 | 8.55E-09 | GGCX    | 0.363391496 | 0.00293 |
| TRAF1    | -0.641051898 | 8.80E-09 | POU2AF1 | 0.362185163 | 0.00303 |
| SPTLC1   | -0.640892052 | 8.90E-09 | GRIA3   | 0.358807429 | 0.00333 |
| FTCD     | -0.640804099 | 8.95E-09 | NEUROD6 | 0.358053397 | 0.00341 |
| COPS7B   | -0.640782386 | 8.97E-09 | CNTN5   | 0.356424447 | 0.00357 |
| TMPRSS6  | -0.640154078 | 9.37E-09 | HMGB1   | 0.356263163 | 0.00358 |
| POLDIP2  | -0.640124386 | 9.39E-09 | OAZ2    | 0.354464629 | 0.00377 |
| PRDM4    | -0.640058586 | 9.43E-09 | CDH5    | 0.353186112 | 0.0039  |
| GMIP     | -0.639685719 | 9.68E-09 | MAP2K4  | 0.352753829 | 0.00395 |
| ZNF749   | -0.639680135 | 9.68E-09 | CITED2  | 0.352051962 | 0.00403 |
| CHMP1A   | -0.639137386 | 1.01E-08 | PRPF38B | 0.346809895 | 0.00465 |
| SIPA1L3  | -0.638830319 | 1.03E-08 | FEZF2   | 0.346357476 | 0.00471 |
| ACOX3    | -0.638764519 | 1.03E-08 | DDX5    | 0.345099095 | 0.00487 |
| LSG1     | -0.638764519 | 1.03E-08 | NR4A2   | 0.344528828 | 0.00495 |
| TP53     | -0.638523252 | 1.05E-08 | MEF2C   | 0.342883828 | 0.00517 |
| VAV2     | -0.638435519 | 1.06E-08 | MEMO1   | 0.340975628 | 0.00544 |
| DPP3     | -0.638368011 | 1.06E-08 | AKAP6   | 0.340690495 | 0.00549 |
| RUSC1    | -0.638303919 | 1.07E-08 | BTRC    | 0.338826161 | 0.00576 |
| CC2D1A   | -0.638040719 | 1.09E-08 | SUMO4   | 0.337426142 | 0.00598 |
| STARD3   | -0.637645919 | 1.12E-08 | FHL1    | 0.337071494 | 0.00604 |
| HPS6     | -0.637463469 | 1.13E-08 | FMR1    | 0.335952894 | 0.00622 |
| SLC2A8   | -0.636832576 | 1.18E-08 | SRRM1   | 0.334636894 | 0.00644 |
| WFDC1    | -0.636560865 | 1.20E-08 | GRIA2   | 0.333057694 | 0.00671 |
| GOLGA2   | -0.636417652 | 1.21E-08 | MEF2A   | 0.332597094 | 0.00679 |
| SMG5     | -0.635825452 | 1.26E-08 | NOV     | 0.332531982 | 0.0068  |
| SART3    | -0.635781585 | 1.27E-08 | MRPS17  | 0.33165396  | 0.00696 |
| TSC1     | -0.635079719 | 1.33E-08 | GRM5    | 0.330480473 | 0.00717 |

|        |              |          |         |             |         |
|--------|--------------|----------|---------|-------------|---------|
| WDR82  | -0.634948119 | 1.34E-08 | EIF1    | 0.33000896  | 0.00726 |
| ODF2   | -0.634838452 | 1.35E-08 | SLC6A12 | 0.328329795 | 0.00758 |
| GP5    | -0.634776898 | 1.36E-08 | SLITRK5 | 0.327947227 | 0.00766 |
| DOLPP1 | -0.634399785 | 1.39E-08 | EVI2B   | 0.3279277   | 0.00766 |
| PSPN   | -0.63389351  | 1.44E-08 | KCNC1   | 0.32750856  | 0.00774 |
| DAG1   | -0.633763719 | 1.46E-08 | SLIT2   | 0.327135693 | 0.00782 |

**Table S3: TCGA Demographics by Treatment**

|                   | <b>Chemo</b>   | <b>RT</b>      | <b>Chemo+RT</b> | <b>None</b>    | <b>Total</b>    | <b>P-value</b> |
|-------------------|----------------|----------------|-----------------|----------------|-----------------|----------------|
| Age               | 68.6 +/- 12.6  | 59.8 +/- 13.2  | 55.4 +/- 14.1   | 64.9 +/- 14.3  | 58 +/- 14.5     | <0.0001        |
| MSP               | 0.63 +/- 0.461 | 0.261 +/- 0.39 | 0.459 +/- 0.458 | 0.398 +/- 0.45 | 0.436 +/- 0.454 | 0.032          |
| MSP Missing       | 2 (0.143)      | 42 (0.545)     | 91 (0.277)      | 32 (0.39)      | 167 (0.333)     |                |
| IDH1 WT           | 13 (0.929)     | 42 (0.545)     | 239 (0.726)     | 62 (0.756)     | 356 (0.709)     | 0.17           |
| IDH1 Mut          | 0 (0)          | 4 (0.052)      | 23 (0.07)       | 1 (0.012)      | 28 (0.056)      |                |
| IDH1 Missing      | 1 (0.071)      | 31 (0.403)     | 67 (0.204)      | 19 (0.232)     | 118 (0.235)     |                |
| Female            | 4 (0.286)      | 32 (0.416)     | 120 (0.365)     | 38 (0.463)     | 194 (0.386)     | 0.31           |
| Male              | 10 (0.714)     | 45 (0.584)     | 209 (0.635)     | 44 (0.537)     | 308 (0.614)     |                |
| No prior tx       | 14 (1)         | 77 (1)         | 309 (0.939)     | 82 (1)         | 482 (0.96)      | 0.015          |
| Prior tx          | 0 (0)          | 0 (0)          | 19 (0.058)      | 0 (0)          | 19 (0.038)      |                |
| Missing           | 0 (0)          | 0 (0)          | 1 (0.003)       | 0 (0)          | 1 (0.002)       |                |
| Biopsy            | 5 (0.357)      | 2 (0.026)      | 52 (0.158)      | 6 (0.073)      | 65 (0.129)      | 0.0004         |
| Resection         | 9 (0.643)      | 75 (0.974)     | 277 (0.842)     | 74 (0.902)     | 435 (0.867)     |                |
| Resection Missing | 0 (0)          | 0 (0)          | 0 (0)           | 2 (0.024)      | 2 (0.004)       |                |

**Table S4: Association of Chemo-GS with clinicopathologic variables**

|                           | T1              | T2             | T3              | Total           | P-value* |
|---------------------------|-----------------|----------------|-----------------|-----------------|----------|
| Age                       | 59.9 +/- 13.5   | 58.7 +/- 13.9  | 55.3 +/- 15.7   | 58 +/- 14.5     | 0.0002   |
| Female                    | 56 (0.333)      | 63 (0.377)     | 75 (0.449)      | 194 (0.386)     | 0.12     |
| Male                      | 112 (0.667)     | 104 (0.623)    | 92 (0.551)      | 308 (0.614)     |          |
| MGMT promoter methylation | 0.197 +/- 0.345 | 0.46 +/- 0.462 | 0.744 +/- 0.385 | 0.436 +/- 0.454 | 0.21     |
| MGMT missing              | 34 (0.202)      | 62 (0.371)     | 71 (0.425)      | 167 (0.333)     |          |
| IDH1 Wildtype             | 139 (0.827)     | 112 (0.671)    | 105 (0.629)     | 356 (0.709)     | <0.0001  |
| IDH1 Mutant               | 3 (0.018)       | 8 (0.048)      | 17 (0.102)      | 28 (0.056)      |          |
| IDH1 Missing              | 26 (0.155)      | 47 (0.281)     | 45 (0.269)      | 118 (0.235)     |          |
| No Radiation              | 35 (0.208)      | 32 (0.192)     | 29 (0.174)      | 96 (0.191)      | 0.41     |
| Radiation                 | 133 (0.792)     | 135 (0.808)    | 138 (0.826)     | 406 (0.809)     |          |
| No Chemo                  | 54 (0.321)      | 59 (0.353)     | 46 (0.275)      | 159 (0.317)     | 0.069    |
| Alkylating Chemo          | 114 (0.679)     | 108 (0.647)    | 121 (0.725)     | 343 (0.683)     |          |
| No Chemo and RT           | 57 (0.339)      | 64 (0.383)     | 52 (0.311)      | 173 (0.345)     | 0.15     |
| Chemo and RT              | 111 (0.661)     | 103 (0.617)    | 115 (0.689)     | 329 (0.655)     |          |
| No Prior Treatment        | 159 (0.946)     | 160 (0.958)    | 163 (0.976)     | 482 (0.96)      | 0.036    |
| Prior Treatment           | 9 (0.054)       | 7 (0.042)      | 3 (0.018)       | 19 (0.038)      |          |
| Prior Treatment Missing   | 0 (0)           | 0 (0)          | 1 (0.006)       | 1 (0.002)       |          |
| Biopsy                    | 25 (0.149)      | 22 (0.132)     | 18 (0.108)      | 65 (0.129)      | 0.71     |
| Resection                 | 143 (0.851)     | 145 (0.868)    | 147 (0.88)      | 435 (0.867)     |          |
| Resection Missing         | 0 (0)           | 0 (0)          | 2 (0.012)       | 2 (0.004)       |          |

\*P-values were assessed with Chemo-GS as a continuous variable as in the rest of the manuscript.

\*Spearman's correlation was used to test continuous variables and a T-test was used for binary variables.

Note: T1, T2, T3 refer to the Chemo-GS tertiles, with T1 the lowest, and T3 the highest tertile.

**Table S5: Association of RT-GS with clinicopathologic variables**

|                           | T1              | T2              | T3              | Total           | P-value* |
|---------------------------|-----------------|-----------------|-----------------|-----------------|----------|
| Age                       | 59.8 +/- 13.2   | 60.3 +/- 12     | 53.9 +/- 17.1   | 58 +/- 14.5     | 0.009    |
| Female                    | 70 (0.417)      | 68 (0.407)      | 56 (0.335)      | 194 (0.386)     | 0.02     |
| Male                      | 98 (0.583)      | 99 (0.593)      | 111 (0.665)     | 308 (0.614)     |          |
| MGMT promoter methylation | 0.454 +/- 0.453 | 0.325 +/- 0.431 | 0.534 +/- 0.459 | 0.436 +/- 0.454 | <0.0001  |
| MGMT missing              | 52 (0.31)       | 54 (0.323)      | 61 (0.365)      | 167 (0.333)     |          |
| IDH1 Wildtype             | 127 (0.756)     | 125 (0.749)     | 104 (0.623)     | 356 (0.709)     | 0.0008   |
| IDH1 Mutant               | 1 (0.006)       | 4 (0.024)       | 23 (0.138)      | 28 (0.056)      |          |
| IDH1 Missing              | 40 (0.238)      | 38 (0.228)      | 40 (0.24)       | 118 (0.235)     |          |
| No Radiation              | 31 (0.185)      | 36 (0.216)      | 29 (0.174)      | 96 (0.191)      | 0.61     |
| Radiation                 | 137 (0.815)     | 131 (0.784)     | 138 (0.826)     | 406 (0.809)     |          |
| No Chemo                  | 54 (0.321)      | 58 (0.347)      | 47 (0.281)      | 159 (0.317)     | 0.41     |
| Alkylating Chemo          | 114 (0.679)     | 109 (0.653)     | 120 (0.719)     | 343 (0.683)     |          |
| No Chemo and RT           | 57 (0.339)      | 63 (0.377)      | 53 (0.317)      | 173 (0.345)     | 0.52     |
| Chemo and RT              | 111 (0.661)     | 104 (0.623)     | 114 (0.683)     | 329 (0.655)     |          |
| No Prior Treatment        | 165 (0.982)     | 160 (0.958)     | 157 (0.94)      | 482 (0.96)      | 0.16     |
| Prior Treatment           | 2 (0.012)       | 7 (0.042)       | 10 (0.06)       | 19 (0.038)      |          |
| Prior Treatment Missing   | 1 (0.006)       | 0 (0)           | 0 (0)           | 1 (0.002)       |          |
| Biopsy                    | 18 (0.107)      | 28 (0.168)      | 19 (0.114)      | 65 (0.129)      | 0.12     |
| Resection                 | 150 (0.893)     | 139 (0.832)     | 146 (0.874)     | 435 (0.867)     |          |
| Resection Missing         | 0 (0)           | 0 (0)           | 2 (0.012)       | 2 (0.004)       |          |

\*P-values were assessed with RT-GS as a continuous variable as in the rest of the manuscript.

\*Spearman's correlation was used to test continuous variables and a T-test was used for binary variables.

Note: T1, T2, T3 refer to the RT-GS tertiles, with T1 the lowest, and T3 the highest tertile.



**Table S6: Association of ChemoRT-GS with clinicopathologic variables**

|                           | T1              | T2              | T3              | Total           | P-value* |
|---------------------------|-----------------|-----------------|-----------------|-----------------|----------|
| Age                       | 60.3 +/- 13.7   | 58.2 +/- 13.6   | 55.4 +/- 15.7   | 58 +/- 14.5     | 0.004    |
| Female                    | 70 (0.417)      | 62 (0.371)      | 62 (0.371)      | 194 (0.386)     | 0.65     |
| Male                      | 98 (0.583)      | 105 (0.629)     | 105 (0.629)     | 308 (0.614)     |          |
| MGMT promoter methylation | 0.266 +/- 0.397 | 0.495 +/- 0.463 | 0.639 +/- 0.432 | 0.436 +/- 0.454 | <0.0001  |
| MGMT missing              | 29 (0.173)      | 54 (0.323)      | 84 (0.503)      | 167 (0.333)     |          |
| IDH1 Wildtype             | 138 (0.821)     | 122 (0.731)     | 96 (0.575)      | 356 (0.709)     | <0.0001  |
| IDH1 Mutant               | 3 (0.018)       | 5 (0.03)        | 20 (0.12)       | 28 (0.056)      |          |
| IDH1 Missing              | 27 (0.161)      | 40 (0.24)       | 51 (0.305)      | 118 (0.235)     |          |
| No Radiation              | 32 (0.19)       | 30 (0.18)       | 34 (0.204)      | 96 (0.191)      | 0.79     |
| Radiation                 | 136 (0.81)      | 137 (0.82)      | 133 (0.796)     | 406 (0.809)     |          |
| No Chemo                  | 58 (0.345)      | 51 (0.305)      | 50 (0.299)      | 159 (0.317)     | 0.21     |
| Alkylating Chemo          | 110 (0.655)     | 116 (0.695)     | 117 (0.701)     | 343 (0.683)     |          |
| No Chemo and RT           | 60 (0.357)      | 56 (0.335)      | 57 (0.341)      | 173 (0.345)     | 0.52     |
| Chemo and RT              | 108 (0.643)     | 111 (0.665)     | 110 (0.659)     | 329 (0.655)     |          |
| No Prior Treatment        | 160 (0.952)     | 160 (0.958)     | 162 (0.97)      | 482 (0.96)      | 0.46     |
| Prior Treatment           | 8 (0.048)       | 7 (0.042)       | 4 (0.024)       | 19 (0.038)      |          |
| Prior Treatment Missing   | 0 (0)           | 0 (0)           | 1 (0.006)       | 1 (0.002)       |          |
| Biopsy                    | 21 (0.125)      | 25 (0.15)       | 19 (0.114)      | 65 (0.129)      | 0.63     |
| Resection                 | 147 (0.875)     | 142 (0.85)      | 146 (0.874)     | 435 (0.867)     |          |
| Resection Missing         | 0 (0)           | 0 (0)           | 2 (0.012)       | 2 (0.004)       |          |

\*P-values were assessed with ChemoRT-GS as a continuous variable as in the rest of the manuscript.

\*Spearman's correlation was used to test continuous variables and a T-test was used for binary variables.

Note: T1, T2, T3 refer to the ChemoRT-GS tertiles, with T1 the lowest, and T3 the highest tertile.
